# Supplementary material
Source: publisher figshare collection journal article supplement (https://acs.figshare.com/ndownloader/files/23184419)
Supplement: Supplementary file 1 [file 23184419]

## Sheet: oligo_sequences
Primer name	Library construction method	sequence
NOD-AN-96-F-NDT	KLD	NDTGTTTGGGAATGTAATAGAGACGCTATAAAAGAAGTCCTGGGCC
NOD-AN-96-F-VHG	KLD	VHGGTTTGGGAATGTAATAGAGACGCTATAAAAGAAGTCCTGGGCC
NOD-AN-96-F-TGG	KLD	TGGGTTTGGGAATGTAATAGAGACGCTATAAAAGAAGTCCTGGGCC
NOD-AN-97-F-NDT	KLD	NDTTGGGAATGTAATAGAGACGCTATAAAAGAAGTCCTGGGCC
NOD-AN-97-F-VHG	KLD	VHGTGGGAATGTAATAGAGACGCTATAAAAGAAGTCCTGGGCC
NOD-AN-97-F-TGG	KLD	TGGTGGGAATGTAATAGAGACGCTATAAAAGAAGTCCTGGGCC
NOD-AN-84-F-NDT	KLD	NDTGCACGCGCAGGAGTGCAGGC
NOD-AN-84-F-VHG	KLD	VHGGCACGCGCAGGAGTGCAGGC
NOD-AN-84-F-TGG	KLD	TGGGCACGCGCAGGAGTGCAGGC
NOD-AN-53-F-NDT	KLD	NDTCACAAGCTTGCGTCGGCCCTGTTG
NOD-AN-53-F-VHG	KLD	VHGCACAAGCTTGCGTCGGCCCTGTTG
NOD-AN-53-F-TGG	KLD	TGGCACAAGCTTGCGTCGGCCCTGTTG
NOD-AN-35-F-NDT	KLD	NDTTTCGAACGGTATCCCGAAACGCGGAGC
NOD-AN-35-F-VHG	KLD	VHGTTCGAACGGTATCCCGAAACGCGGAGC
NOD-AN-35-F-TGG	KLD	TGGTTCGAACGGTATCCCGAAACGCGGAGC
NOD-AN-56-F-NDT	KLD	NDTGCGTCGGCCCTGTTGGCCTACG
NOD-AN-56-F-VHG	KLD	VHGGCGTCGGCCCTGTTGGCCTACG
NOD-AN-56-F-TGG	KLD	TGGGCGTCGGCCCTGTTGGCCTACG
NOD-AN-60-F-NDT	KLD	NDTTTGGCCTACGCCCGTAGTATCGACAACC
NOD-AN-60-F-VHG	KLD	VHGTTGGCCTACGCCCGTAGTATCGACAACC
NOD-AN-60-F-TGG	KLD	TGGTTGGCCTACGCCCGTAGTATCGACAACC
NOD-AN-42-F-NDT	KLD	NDTCGGAGCTTGTTTGAACTTCCTGAGAGAGCGA
NOD-AN-42-F-VHG	KLD	VHGCGGAGCTTGTTTGAACTTCCTGAGAGAGCGA
NOD-AN-42-F-TGG	KLD	TGGCGGAGCTTGTTTGAACTTCCTGAGAGAGCGA
NOD-AN-125-F-NDT	KLD	NDTGATTTTTTAGCTCATTTACTGTCTACCAAGGAAGCGCAAGTCT
NOD-AN-125-F-VHG	KLD	VHGGATTTTTTAGCTCATTTACTGTCTACCAAGGAAGCGCAAGTCT
NOD-AN-125-F-TGG	KLD	TGGGATTTTTTAGCTCATTTACTGTCTACCAAGGAAGCGCAAGTCT
NOD-AN-35-R	KLD	CAGCCGATACATCGTGGCGCTAATAGCGA
NOD-AN-84-R	KLD	GGAAAGCACCATGCGGCGGATGGC
NOD-AN-53-R	KLD	CGCTCTCTCAGGAAGTTCAAACAAGCTCCGC
NOD-AN-56-R	KLD	CTTGTGTATCGCTCTCTCAGGAAGTTCAAACAAGCTCC
NOD-AN-60-R	KLD	GGCCGACGCAAGCTTGTGTATCGCT
NOD-AN-96-R	KLD	CGGATAATGGACGGCCTGCACTCCTGC
NOD-AN-42-R	KLD	TTCGGGATACCGTTCGAAAAGCAGCCG
NOD-AN-97-R	KLD	CAGCGGATAATGGACGGCCTGCACTC
NOD-AN-125-R	KLD	GGCTTCCTTCCACGCCTGCAGAAGG
NOD_AHN_A59X_F_NDT	KLD	NDTCATTTGGCCTACGCCCGTAGTATC
NOD_AHN_A59X_F_TGG	KLD	TGGCATTTGGCCTACGCCCGTAGTATC
NOD_AHN_A59X_F_VHG	KLD	VHGCATTTGGCCTACGCCCGTAGTATC
NOD_AHN_A59X_R	KLD	CGACGCAAGCTTGTGTATCGCTCTC
NOD_AHN_E47X_F_NDT	KLD	NDTCTTCCTGAGAGAGCGATACACAAGC
NOD_AHN_E47X_F_TGG	KLD	TGGCTTCCTGAGAGAGCGATACACAAGC
NOD_AHN_E47X_F_VHG	KLD	VHGCTTCCTGAGAGAGCGATACACAAGC
NOD_AHN_E47X_R	KLD	AAACAAGCTCCGCGTTTCGGG
NOD_AHN_H84X_F_NDT	KLD	NDTGCACGCGCAGGAGTG
NOD_AHN_H84X_F_TGG	KLD	TGGGCACGCGCAGGAGTG
NOD_AHN_H84X_F_VHG	KLD	VHGGCACGCGCAGGAGTG
NOD_AHN_H84X_R	KLD	GGAAAGCACCATGCGGC
NOD_AHN_I105X_F_NDT	KLD	NDTAAAGAAGTCCTGGGCCCG
NOD_AHN_I105X_F_TGG	KLD	TGGAAAGAAGTCCTGGGCCCG
NOD_AHN_I105X_F_VHG	KLD	VHGAAAGAAGTCCTGGGCCCG
NOD_AHN_I105X_R	KLD	AGCGTCTCTATTACATTCCCAAACC
NOD_AHN_I27X_F_NDT	KLD	NDTAGCGCCACGATGTATCGGC
NOD_AHN_I27X_F_TGG	KLD	TGGAGCGCCACGATGTATCGGC
NOD_AHN_I27X_F_VHG	KLD	VHGAGCGCCACGATGTATCGGC
NOD_AHN_I27X_R	KLD	AGCGACTGAGTGTTTCTGCAGTG
NOD_AHN_K55X_F_NDT	KLD	NDTCTTGCGTCGGCCCATTTGG
NOD_AHN_K55X_F_TGG	KLD	TGGCTTGCGTCGGCCCATTTGG
NOD_AHN_K55X_F_VHG	KLD	VHGCTTGCGTCGGCCCATTTGG
NOD_AHN_K55X_R	KLD	GTGTATCGCTCTCTCAGGAAGTTCAAAC
NOD_AHN_L48X_F_NDT	KLD	NDTCCTGAGAGAGCGATACACAAGC
NOD_AHN_L48X_F_TGG	KLD	TGGCCTGAGAGAGCGATACACAAGC
NOD_AHN_L48X_F_VHG	KLD	VHGCCTGAGAGAGCGATACACAAGC
NOD_AHN_L48X_R	KLD	TTCAAACAAGCTCCGCGTTTCG
NOD_AHN_P111X_F_NDT	KLD	NDTGATGCCACCGAGACCCTTCTG
NOD_AHN_P111X_F_TGG	KLD	TGGGATGCCACCGAGACCCTTCTG
NOD_AHN_P111X_F_VHG	KLD	VHGGATGCCACCGAGACCCTTCTG
NOD_AHN_P111X_R	KLD	GCCCAGGACTTCTTTTATAGCGTCTC
NOD_AHN_R43X_F_NDT	KLD	NDTAGCTTGTTTGAACTTCCTGAGAGAGCG
NOD_AHN_R43X_F_TGG	KLD	TGGAGCTTGTTTGAACTTCCTGAGAGAGCG
NOD_AHN_R43X_F_VHG	KLD	VHGAGCTTGTTTGAACTTCCTGAGAGAGCG
NOD_AHN_R43X_R	KLD	CGTTTCGGGATACCGTTCGAAAAGC
NOD_AHN_R86X_F_NDT	KLD	NDTGCAGGAGTGCAGGCC
NOD_AHN_R86X_F_TGG	KLD	TGGGCAGGAGTGCAGGCC
NOD_AHN_R86X_F_VHG	KLD	VHGGCAGGAGTGCAGGCC
NOD_AHN_R86X_R	KLD	TGCGTGGGAAAGCACCATG
NOD_AHN_S28X_F_NDT	KLD	NDTGCCACGATGTATCGGCTGCTTTTC
NOD_AHN_S28X_F_TGG	KLD	TGGGCCACGATGTATCGGCTGCTTTTC
NOD_AHN_S28X_F_VHG	KLD	VHGGCCACGATGTATCGGCTGCTTTTC
NOD_AHN_S28X_R	KLD	AATAGCGACTGAGTGTTTCTGCAGTG
NOD_AHN_S83X_F_NDT	KLD	NDTCACGCACGCGCAGG
NOD_AHN_S83X_F_TGG	KLD	TGGCACGCACGCGCAGG
NOD_AHN_S83X_F_VHG	KLD	VHGCACGCACGCGCAGG
NOD_AHN_S83X_R	KLD	AAGCACCATGCGGCG
NOD_AHN_W121X_F_NDT	KLD	NDTAAGGAAGCCTATGATTTTTTAGCTCATTTACTGTCTAC
NOD_AHN_W121X_F_TGG	KLD	TGGAAGGAAGCCTATGATTTTTTAGCTCATTTACTGTCTAC
NOD_AHN_W121X_F_VHG	KLD	VHGAAGGAAGCCTATGATTTTTTAGCTCATTTACTGTCTAC
NOD_AHN_W121X_R	KLD	CGCCTGCAGAAGGGTCTCG
NOD_AHN_Y94X_F_NDT	KLD	NDTCCGCTGGTTTGGGAATGTAATAGAGAC
NOD_AHN_Y94X_F_TGG	KLD	TGGCCGCTGGTTTGGGAATGTAATAGAGAC
NOD_AHN_Y94X_F_VHG	KLD	VHGCCGCTGGTTTGGGAATGTAATAGAGAC
NOD_AHN_Y94X_R	KLD	ATGGACGGCCTGCACTCCTG
S16-R	Gibson assembly	CGCACGTACCAACTGACGGGTCTGTTCCG
S16_NDT-F	Gibson assembly	CGTCAGTTGGTACGTGCGNDTGTGCCTGCACTGCAGAAACACTCAGTC
S16_TGG-F	Gibson assembly	CGTCAGTTGGTACGTGCGTGGGTGCCTGCACTGCAGAAACACTCAGTC
S16_VHG-F	Gibson assembly	CGTCAGTTGGTACGTGCGVHGGTGCCTGCACTGCAGAAACACTCAGTC
A19-R	Gibson assembly	AGGCACAGACGCACGTACCAACTGACGGG
A19_NDT-F	Gibson assembly	TTGGTACGTGCGTCTGTGCCTNDTCTGCAGAAACACTCAGTCGC
A19_TGG-F	Gibson assembly	TTGGTACGTGCGTCTGTGCCTTGGCTGCAGAAACACTCAGTCGC
A19_VHG-F	Gibson assembly	TTGGTACGTGCGTCTGTGCCTVHGCTGCAGAAACACTCAGTCGC
L20-R	Gibson assembly	AGGCACAGACGCACGTACCAACTGACGGG
L20_NDT-F	Gibson assembly	CGTGCGTCTGTGCCTGCANDTCAGAAACACTCAGTCGCTATTAGC
L20_TGG-F	Gibson assembly	CGTGCGTCTGTGCCTGCATGGCAGAAACACTCAGTCGCTATTAGC
L20_VHG-F	Gibson assembly	CGTGCGTCTGTGCCTGCAVHGCAGAAACACTCAGTCGCTATTAGC
H23-F	Gibson assembly	TCAGTCGCTATTAGCGCCACGATGTATCGGC
H23_AHN-R	Gibson assembly	GCGCTAATAGCGACTGAAHNTTTCTGCAGTGCAGGCAC
H23_CCA-R	Gibson assembly	GCGCTAATAGCGACTGACCATTTCTGCAGTGCAGGCAC
H23_CDB-R	Gibson assembly	GCGCTAATAGCGACTGACDBTTTCTGCAGTGCAGGCAC
S24-F	Gibson assembly	CGCTATTAGCGCCACGATGTATCGGCTGCTTTTCGAACGGTATCCC
S24_AHN-R	Gibson assembly	ATACATCGTGGCGCTAATAGCGACAHNGTGTTTCTGCAGTGCAGGCAC
S24_CCA-R	Gibson assembly	ATACATCGTGGCGCTAATAGCGACCCAGTGTTTCTGCAGTGCAGGCAC
S24_CDB-R	Gibson assembly	ATACATCGTGGCGCTAATAGCGACCDBGTGTTTCTGCAGTGCAGGCAC
I27-F	Gibson assembly	GCGCCACGATGTATCGGCTGCTTTTCGAACG
I27_AHN-R	Gibson assembly	CGATACATCGTGGCGCTAHNAGCGACTGAGTGTTTCTGC
I27_CCA-R	Gibson assembly	CGATACATCGTGGCGCTCCAAGCGACTGAGTGTTTCTGC
I27_CDB-R	Gibson assembly	CGATACATCGTGGCGCTCDBAGCGACTGAGTGTTTCTGC
S28-F	Gibson assembly	GCCACGATGTATCGGCTGCTTTTCGAACGGTATCC
S28_AHN-R	Gibson assembly	CAGCCGATACATCGTGGCAHNAATAGCGACTGAGTGTTTCTGC
S28_CCA-R	Gibson assembly	CAGCCGATACATCGTGGCCCAAATAGCGACTGAGTGTTTCTGC
S28_CDB-R	Gibson assembly	CAGCCGATACATCGTGGCCDBAATAGCGACTGAGTGTTTCTGC
M31-R	Gibson assembly	CGTGGCGCTAATAGCGACTGAGTGTTTCTGCAGTGC
M31_NDT-F	Gibson assembly	TCGCTATTAGCGCCACGNDTTATCGGCTGCTTTTCGAACGGTATCC
M31_TGG-F	Gibson assembly	TCGCTATTAGCGCCACGTGGTATCGGCTGCTTTTCGAACGGTATCC
M31_VHG-F	Gibson assembly	TCGCTATTAGCGCCACGVHGTATCGGCTGCTTTTCGAACGGTATCC
F36-F	Gibson assembly	GAACGGTATCCCGAAACGCGGAGCTTGTTTGAACTTCCTG
F36_AHN-R	Gibson assembly	GCGTTTCGGGATACCGTTCAHNAAGCAGCCGATACATCG
F36_CCA-R	Gibson assembly	GCGTTTCGGGATACCGTTCCCAAAGCAGCCGATACATCG
F36_CDB-R	Gibson assembly	GCGTTTCGGGATACCGTTCCDBAAGCAGCCGATACATCG
F46-R	Gibson assembly	CAAGCTCCGCGTTTCGGGATACCGTTCGAAAAGC
F46_NDT-F	Gibson assembly	CCGAAACGCGGAGCTTGNDTGAACTTCCTGAGAGAGCG
F46_TGG-F	Gibson assembly	CCGAAACGCGGAGCTTGTGGGAACTTCCTGAGAGAGCG
F46_VHG-F	Gibson assembly	CCGAAACGCGGAGCTTGVHGGAACTTCCTGAGAGAGCG
P49-F	Gibson assembly	GAGAGAGCGATACACAAGCTTGCGTCGGCCCATTTGG
P49_AHN-R	Gibson assembly	GCTTGTGTATCGCTCTCTCAHNAAGTTCAAACAAGCTCCGCGTTTCG
P49_CCA-R	Gibson assembly	GCTTGTGTATCGCTCTCTCCCAAAGTTCAAACAAGCTCCGCGTTTCG
P49_CDB-R	Gibson assembly	GCTTGTGTATCGCTCTCTCCDBAAGTTCAAACAAGCTCCGCGTTTCG
L56-R	Gibson assembly	CTTGTGTATCGCTCTCTCAGGAAGTTCAAACAAGCTCCGCGTTTCGGG
L56_NDT-F	Gibson assembly	CCTGAGAGAGCGATACACAAGNDTGCGTCGGCCCATTTGG
L56_TGG-F	Gibson assembly	CCTGAGAGAGCGATACACAAGTGGGCGTCGGCCCATTTGG
L56_VHG-F	Gibson assembly	CCTGAGAGAGCGATACACAAGVHGGCGTCGGCCCATTTGG
R79-R	Gibson assembly	GCGGATGGCCGCCTGTAACGCCGATGGGTTGTCGATACTACGGG
R79_NDT-F	Gibson assembly	TTACAGGCGGCCATCCGCNDTATGGTGCTTTCCCACG
R79_TGG-F	Gibson assembly	TTACAGGCGGCCATCCGCTGGATGGTGCTTTCCCACG
R79_VHG-F	Gibson assembly	TTACAGGCGGCCATCCGCVHGATGGTGCTTTCCCACG
W98-F	Gibson assembly	AATGTAATAGAGACGCTATGAAAGAAGTCCTGGGCCCGGATGCCACCGAG
W98_AHN-R	Gibson assembly	ACTTCTTTCATAGCGTCTCTATTACATTCAHNAACCAGCGGATAATGGACGGCCTGC
W98_CCA-R	Gibson assembly	ACTTCTTTCATAGCGTCTCTATTACATTCCCAAACCAGCGGATAATGGACGGCCTGC
W98_CDB-R	Gibson assembly	ACTTCTTTCATAGCGTCTCTATTACATTCCDBAACCAGCGGATAATGGACGGCCTGC
C100-F	Gibson assembly	AATAGAGACGCTATGAAAGAAGTCCTGGGCCCGGATGCCACCGAG
C100_AHN-R	Gibson assembly	ACTTCTTTCATAGCGTCTCTATTAHNTTCCCAAACCAGCGGATAATGGACGGCCTGC
C100_CCA-R	Gibson assembly	ACTTCTTTCATAGCGTCTCTATTCCATTCCCAAACCAGCGGATAATGGACGGCCTGC
C100_CDB-R	Gibson assembly	ACTTCTTTCATAGCGTCTCTATTCDBTTCCCAAACCAGCGGATAATGGACGGCCTGC
V108-R	Gibson assembly	TTCTTTCATAGCGTCTCTATTACATTCCCAAACCAGCGGATAATGGACGGCCTGC
V108_NDT-F	Gibson assembly	AATGTAATAGAGACGCTATGAAAGAANDTCTGGGCCCGGATGCCACCGAG
V108_TGG-F	Gibson assembly	AATGTAATAGAGACGCTATGAAAGAATGGCTGGGCCCGGATGCCACCGAG
V108_VHG-F	Gibson assembly	AATGTAATAGAGACGCTATGAAAGAAVHGCTGGGCCCGGATGCCACCGAG
V109-R	Gibson assembly	GACTTCTTTCATAGCGTCTCTATTACATTCCCAAACCAGCGGATAATGGACGGCCTGC
V109_NDT-F	Gibson assembly	AATGTAATAGAGACGCTATGAAAGAAGTCNDTGGCCCGGATGCCACCGAG
V109_TGG-F	Gibson assembly	AATGTAATAGAGACGCTATGAAAGAAGTCTGGGGCCCGGATGCCACCGAG
V109_VHG-F	Gibson assembly	AATGTAATAGAGACGCTATGAAAGAAGTCVHGGGCCCGGATGCCACCGAG
D112-F	Gibson assembly	GCCACCGAGACCCTTCTGCAGGCGTGGAAGGAAGCCTATGATTTTTTAGC
D112_AHN-R	Gibson assembly	GAAGGGTCTCGGTGGCAHNCGGGCCCAGGACTTCTTTCATAGCGTC
D112_CCA-R	Gibson assembly	GAAGGGTCTCGGTGGCCCACGGGCCCAGGACTTCTTTCATAGCGTC
D112_CDB-R	Gibson assembly	GAAGGGTCTCGGTGGCCDBCGGGCCCAGGACTTCTTTCATAGCGTC
L117-R	Gibson assembly	GGTCTCGGTGGCATCCGGGCCCAGGACTTCTTTCATAGCGTC
L117_NDT-F	Gibson assembly	CGGATGCCACCGAGACCNDTCTGCAGGCGTGGAAGGAAGCCTATGATTTTTTAGC
L117_TGG-F	Gibson assembly	CGGATGCCACCGAGACCTGGCTGCAGGCGTGGAAGGAAGCCTATGATTTTTTAGC
L117_VHG-F	Gibson assembly	CGGATGCCACCGAGACCVHGCTGCAGGCGTGGAAGGAAGCCTATGATTTTTTAGC
L118-R	Gibson assembly	AAGGGTCTCGGTGGCATCCGGGCCCAGGACTTCTTTCATAGCGTC
L118_NDT-F	Gibson assembly	GATGCCACCGAGACCCTTNDTCAGGCGTGGAAGGAAGCCTATGATTTTTTAGC
L118_TGG-F	Gibson assembly	GATGCCACCGAGACCCTTTGGCAGGCGTGGAAGGAAGCCTATGATTTTTTAGC
L118_VHG-F	Gibson assembly	GATGCCACCGAGACCCTTVHGCAGGCGTGGAAGGAAGCCTATGATTTTTTAGC
Universal-F_ampR	Gibson assembly	CCAACTTACTTCTGACAACGATCGGAGGACCGAAGGAGCTAACCGCTTTTTTGC
Universal-R_ampR	Gibson assembly	CGATCGTTGTCAGAAGTAAGTTGGCCGCAGTGTTATCACTCATGGTTATGGCAG
Recomb1_55_TTT-R	Gibson assembly	CCGACGCAAGTTTGTGTATCGCTCTCTCAGG
Recomb1_55_GRT-R	Gibson assembly	CCGACGCAAGGRTGTGTATCGCTCTCTCAGG
Recomb1_55_CAC-R	Gibson assembly	CCGACGCAAGCACGTGTATCGCTCTCTCAGG
Recomb1_60_VTG-F	Gibson assembly	CCVTGTTGGCCTACGCCCGTAGTATCGACAAC
Recomb1_60_CAT-F	Gibson assembly	CCCATTTGGCCTACGCCCGTAGTATCGACAAC
Recomb1_101_CWG-R	Gibson assembly	GTCTCTCWGACATTCCCAAACCAGCG
Recomb1_101_GKT-R	Gibson assembly	GTCTCTGKTACATTCCCAAACCAGCG
Recomb1_105_ATS-F	Gibson assembly	GCTATSAAAGAAGTCCTGGGCCCG
Recomb2_M31F-F	Gibson assembly	AAACACTCAGTCGCTATTAGCGCCACGTTTTATCGGCTGCTTTTCGAACGGTATCCC
Recomb2_L20W-R	Gibson assembly	CGCTAATAGCGACTGAGTGTTTCTGCCATGCAGGCACAGACGCACGTACCAAC
RmaNOD_M31_NDT	KLD	NDTTATCGGCTGCTTTTCGAACGGTATCC
RmaNOD_F36_NDT	KLD	NDTGAACGGTATCCCGAAACGCGGA
RmaNOD_Y39_NDT	KLD	NDTCCCGAAACGCGGAGCTTGTT
RmaNOD_F46_NDT	KLD	NDTGAACTTCCTGAGAGAGCGATACACAAGC
RmaNOD_L48_NDT	KLD	NDTCCTGAGAGAGCGATACACAAGCTTGC
RmaNOD_P49_NDT	KLD	NDTGAGAGAGCGATACACAAGCTTGCG
RmaNOD_I53_NDT	KLD	NDTCACAAGCTTGCGTCGGCCC
RmaNOD_L56_NDT	KLD	NDTGCGTCGGCCCTGTTGGCCTA
RmaNOD_R79_NDT	KLD	NDTATGGTGCTTTCCCACGCACG
RmaNOD_R86_NDT	KLD	NDTGCAGGAGTGCAGGCCGTC
RmaNOD_V89_NDT	KLD	NDTCAGGCCGTCCATTATCCGCTG
RmaNOD_L101_NDT	KLD	NDTAGAGACGCTATAAAAGAAGTCCTGGGC
RmaNOD_M31_VHG	KLD	VHGTATCGGCTGCTTTTCGAACGGTATCC
RmaNOD_F36_VHG	KLD	VHGGAACGGTATCCCGAAACGCGGA
RmaNOD_Y39_VHG	KLD	VHGCCCGAAACGCGGAGCTTGTT
RmaNOD_F46_VHG	KLD	VHGGAACTTCCTGAGAGAGCGATACACAAGC
RmaNOD_L48_VHG	KLD	VHGCCTGAGAGAGCGATACACAAGCTTGC
RmaNOD_P49_VHG	KLD	VHGGAGAGAGCGATACACAAGCTTGCG
RmaNOD_I53_VHG	KLD	VHGCACAAGCTTGCGTCGGCCC
RmaNOD_L56_VHG	KLD	VHGGCGTCGGCCCTGTTGGCCTA
RmaNOD_R79_VHG	KLD	VHGATGGTGCTTTCCCACGCACG
RmaNOD_R86_VHG	KLD	VHGGCAGGAGTGCAGGCCGTC
RmaNOD_V89_VHG	KLD	VHGCAGGCCGTCCATTATCCGCTG
RmaNOD_L101_VHG	KLD	VHGAGAGACGCTATAAAAGAAGTCCTGGGC
RmaNOD_M31_TGG	KLD	TGGTATCGGCTGCTTTTCGAACGGTATCC
RmaNOD_F36_TGG	KLD	TGGGAACGGTATCCCGAAACGCGGA
RmaNOD_Y39_TGG	KLD	TGGCCCGAAACGCGGAGCTTGTT
RmaNOD_F46_TGG	KLD	TGGGAACTTCCTGAGAGAGCGATACACAAGC
RmaNOD_L48_TGG	KLD	TGGCCTGAGAGAGCGATACACAAGCTTGC
RmaNOD_P49_TGG	KLD	TGGGAGAGAGCGATACACAAGCTTGCG
RmaNOD_I53_TGG	KLD	TGGCACAAGCTTGCGTCGGCCC
RmaNOD_L56_TGG	KLD	TGGGCGTCGGCCCTGTTGGCCTA
RmaNOD_R79_TGG	KLD	TGGATGGTGCTTTCCCACGCACG
RmaNOD_R86_TGG	KLD	TGGGCAGGAGTGCAGGCCGTC
RmaNOD_V89_TGG	KLD	TGGCAGGCCGTCCATTATCCGCTG
RmaNOD_L101_TGG	KLD	TGGAGAGACGCTATAAAAGAAGTCCTGGGC
RmaNOD_M31_rev	KLD	CGTGGCGCTAATAGCGACTGAGTG
RmaNOD_F36_rev	KLD	AAGCAGCCGATACATCGTGGCG
RmaNOD_Y39_rev	KLD	CCGTTCGAAAAGCAGCCGATACATC
RmaNOD_F46_rev	KLD	CAAGCTCCGCGTTTCGGGATAC
RmaNOD_L48_rev	KLD	TTCAAACAAGCTCCGCGTTTCGG
RmaNOD_P49_rev	KLD	AAGTTCAAACAAGCTCCGCGTTTCG
RmaNOD_I53_rev	KLD	CGCTCTCTCAGGAAGTTCAAACAAGCT
RmaNOD_L56_rev	KLD	CTTGTGTATCGCTCTCTCAGGAAGTTCAAACAAGC
RmaNOD_R79_rev	KLD	GCGGATGGCCGCCTGTAAC
RmaNOD_R86_rev	KLD	TGCGTGGGAAAGCACCATGC
RmaNOD_V89_rev	KLD	TCCTGCGCGTGCGTGG
RmaNOD_L101_rev	KLD	ACATTCCCAAACCAGCGGATAATGGAC
Y32TQ52A_H84X_F_NDT	KLD	NDTGCACGCGCAGGAGTGCAGGC
Y32TQ52A_H84X_F_VHG	KLD	VHGGCACGCGCAGGAGTGCAGGC
Y32TQ52A_H84X_F_TGG	KLD	TGGGCACGCGCAGGAGTGCAGGC
Y32TQ52A_I53X_F_NDT	KLD	NDTCACAAGCTTGCGTCGGCCCTGTTG
Y32TQ52A_I53X_F_VHG	KLD	VHGCACAAGCTTGCGTCGGCCCTGTTG
Y32TQ52A_I53X_F_TGG	KLD	TGGCACAAGCTTGCGTCGGCCCTGTTG
Y32TQ52A_L35X_F_NDT	KLD	NDTTTCGAACGGTATCCCGAAACGCGGAGC
Y32TQ52A_L35X_F_VHG	KLD	VHGTTCGAACGGTATCCCGAAACGCGGAGC
Y32TQ52A_L35X_F_TGG	KLD	TGGTTCGAACGGTATCCCGAAACGCGGAGC
Y32TQ52A_L56X_F_NDT	KLD	NDTGCGTCGGCCCTGTTGGCCTACG
Y32TQ52A_L56X_F_VHG	KLD	VHGGCGTCGGCCCTGTTGGCCTACG
Y32TQ52A_L56X_F_TGG	KLD	TGGGCGTCGGCCCTGTTGGCCTACG
Y32TQ52A_L60X_F_NDT	KLD	NDTTTGGCCTACGCCCGTAGTATCGACAACC
Y32TQ52A_L60X_F_VHG	KLD	VHGTTGGCCTACGCCCGTAGTATCGACAACC
Y32TQ52A_L60X_F_TGG	KLD	TGGTTGGCCTACGCCCGTAGTATCGACAACC
Y32TQ52A_L96X_F_NDT	KLD	NDTGTTTGGGAATGTTTGAGAGACGCTATAAAAGAAGTCCTGGG
Y32TQ52A_L96X_F_VHG	KLD	VHGGTTTGGGAATGTTTGAGAGACGCTATAAAAGAAGTCCTGGG
Y32TQ52A_L96X_F_TGG	KLD	TGGGTTTGGGAATGTTTGAGAGACGCTATAAAAGAAGTCCTGGG
Y32TQ52A_T42X_F_NDT	KLD	NDTCGGAGCTTGTTTGAACTTCCTGAGAGAGCGA
Y32TQ52A_T42X_F_VHG	KLD	VHGCGGAGCTTGTTTGAACTTCCTGAGAGAGCGA
Y32TQ52A_T42X_F_TGG	KLD	TGGCGGAGCTTGTTTGAACTTCCTGAGAGAGCGA
Y32TQ52A_V97X_F_NDT	KLD	NDTTGGGAATGTTTGAGAGACGCTATAAAAGAAGTCCTGGGC
Y32TQ52A_V97X_F_VHG	KLD	VHGTGGGAATGTTTGAGAGACGCTATAAAAGAAGTCCTGGGC
Y32TQ52A_V97X_F_TGG	KLD	TGGTGGGAATGTTTGAGAGACGCTATAAAAGAAGTCCTGGGC
Y32TQ52A_Y125X_F_NDT	KLD	NDTGATTTTTTAGCTCATTTACTGTCTACCAAGGAAGCGCAAGTCT
Y32TQ52A_Y125X_F_VHG	KLD	VHGGATTTTTTAGCTCATTTACTGTCTACCAAGGAAGCGCAAGTCT
Y32TQ52A_Y125X_F_TGG	KLD	TGGGATTTTTTAGCTCATTTACTGTCTACCAAGGAAGCGCAAGTCT
NOD_Y39Y_rev	Gibson assembly	CAAACAAGCTCCGCGTTTCGGGATACCGTTCGAAAAGCAGCCGCG
NOD_Y39H_rev	Gibson assembly	CAAACAAGCTCCGCGTTTCGGGATGCCGTTCGAAAAGCAGCCGCG
NOD_L48L_fwd	Gibson assembly	CGAAACGCGGAGCTTGTTTGAACTTCCTGAGAGAGCGATACACAA
NOD_L48R_fwd	Gibson assembly	CGAAACGCGGAGCTTGTTTGAACGTCCTGAGAGAGCGATACACAA
NOD_R79R_rev	Gibson assembly	TGCGTGGGAAAGCACCATGCGGCGGATGGCCGCCTGTAACG
NOD_R79W_rev	Gibson assembly	TGCGTGGGAAAGCACCATCCAGCGGATGGCCGCCTGTAACG
NOD_R79Y_rev	Gibson assembly	TGCGTGGGAAAGCACCATATAGCGGATGGCCGCCTGTAACG
NOD_R79H_rev	Gibson assembly	TGCGTGGGAAAGCACCATGTGGCGGATGGCCGCCTGTAACG
NOD_R79F_rev	Gibson assembly	TGCGTGGGAAAGCACCATGAAGCGGATGGCCGCCTGTAACG
NOD_R86R_for	Gibson assembly	ATGGTGCTTTCCCACGCACGCGCAGGAGTGCAGGCCGTCCA
NOD_R86H_for	Gibson assembly	ATGGTGCTTTCCCACGCACACGCAGGAGTGCAGGCCGTCCA

## Sheet: gene_AA_sequences
Protein name	Amino-acid sequence
RmaNOD wild type (WT)	MAPTLSEQTRQLVRASVPALQKHSVAISATMYRLLFERYPETRSLFELPERQIHKLASALLAYARSIDNPSALQAAIRRMVLSHARAGVQAVHYPLVWECLRDAIKEVLGPDATETLLQAWKEAYDFLAHLLSTKEAQVYAVLAELEHHHHHH*
RmaNOD Q52V	MAPTLSEQTRQLVRASVPALQKHSVAISATMYRLLFERYPETRSLFELPERVIHKLASALLAYARSIDNPSALQAAIRRMVLSHARAGVQAVHYPLVWECLRDAIKEVLGPDATETLLQAWKEAYDFLAHLLSTKEAQVYAVLAELEHHHHHH*
RmaNOD Q52V with cleavable N-terminal His – SUMO construct (underline denotes cleaved region)	MGSSHHHHHHSSGLVPRGSHMASMSDSEVNQEAKPEVKPEVKPETHINLKVSDGSSEIFFKIKKTTPLRRLMEAFAKRQGKEMDSLRFLYDGIRIQADQTPEDLDMEDNDIIEAHREQIGGSMAPTLSEQTRQLVRASVPALQKHSVAISATMYRLLFERYPETRSLFELPERVIHKLASALLAYARSIDNPSALQAAIRRMVLSHARAGVQAVHYPLVWECLRDAIKEVLGPDATETLLQAWKEAYDFLAHLLSTKEAQVYAVLAE**
RmaNOD Q52A	MAPTLSEQTRQLVRASVPALQKHSVAISATMYRLLFERYPETRSLFELPERAIHKLASALLAYARSIDNPSALQAAIRRMVLSHARAGVQAVHYPLVWECLRDAIKEVLGPDATETLLQAWKEAYDFLAHLLSTKEAQVYAVLAELEHHHHHH*
RmaNOD Y32T Q52A	MAPTLSEQTRQLVRASVPALQKHSVAISATMTRLLFERYPETRSLFELPERAIHKLASALLAYARSIDNPSALQAAIRRMVLSHARAGVQAVHYPLVWECLRDAIKEVLGPDATETLLQAWKEAYDFLAHLLSTKEAQVYAVLAELEHHHHHH*
RmaNOD Y32T Y39H L48R Q52A R79W (“THRAW”)	MAPTLSEQTRQLVRASVPALQKHSVAISATMTRLLFERHPETRSLFERPERAIHKLASALLAYARSIDNPSALQAAIRWMVLSHARAGVQAVHYPLVWECLRDAIKEVLGPDATETLLQAWKEAYDFLAHLLSTKEAQVYAVLAELEHHHHHH*
RmaNOD Q52A L101N	MAPTLSEQTRQLVRASVPALQKHSVAISATMYRLLFERYPETRSLFELPERAIHKLASALLAYARSIDNPSALQAAIRRMVLSHARAGVQAVHYPLVWECNRDAIKEVLGPDATETLLQAWKEAYDFLAHLLSTKEAQVYAVLAELEHHHHHH*
RmaNOD Q52A 60H L101N	MAPTLSEQTRQLVRASVPALQKHSVAISATMYRLLFERYPETRSLFELPERAIHKLASAHLAYARSIDNPSALQAAIRRMVLSHARAGVQAVHYPLVWECNRDAIKEVLGPDATETLLQAWKEAYDFLAHLLSTKEAQVYAVLAELEHHHHHH*
RmaNOD Q52A 60H L101N I105M	MAPTLSEQTRQLVRASVPALQKHSVAISATMYRLLFERYPETRSLFELPERAIHKLASAHLAYARSIDNPSALQAAIRRMVLSHARAGVQAVHYPLVWECNRDAMKEVLGPDATETLLQAWKEAYDFLAHLLSTKEAQVYAVLAELEHHHHHH*
RmaNOD L20W Q52A L56I 60H L101N I105M	MAPTLSEQTRQLVRASVPAWQKHSVAISATMYRLLFERYPETRSLFELPERAIHKIASAHLAYARSIDNPSALQAAIRRMVLSHARAGVQAVHYPLVWECNRDAMKEVLGPDATETLLQAWKEAYDFLAHLLSTKEAQVYAVLAELEHHHHHH*

## Sheet: gene_DNA_sequences
Protein name	nucleotide sequence
RmaNOD wild type (WT)	ATGGCGCCGACCCTGTCGGAACAGACCCGTCAGTTGGTACGTGCGTCTGTGCCTGCACTGCAGAAACACTCAGTCGCTATTAGCGCCACGATGTATCGGCTGCTTTTCGAACGGTATCCCGAAACGCGGAGCTTGTTTGAACTTCCTGAGAGACAGATACACAAGCTTGCGTCGGCCCTGTTGGCCTACGCCCGTAGTATCGACAACCCATCGGCGTTACAGGCGGCCATCCGCCGCATGGTGCTTTCCCACGCACGCGCAGGAGTGCAGGCCGTCCATTATCCGCTGGTTTGGGAATGTTTGAGAGACGCTATAAAAGAAGTCCTGGGCCCGGATGCCACCGAGACCCTTCTGCAGGCGTGGAAGGAAGCCTATGATTTTTTAGCTCATTTACTGTCT…
RmaNOD Q52V	ATGGCGCCGACCCTGTCGGAACAGACCCGTCAGTTGGTACGTGCGTCTGTGCCTGCACTGCAGAAACACTCAGTCGCTATTAGCGCCACGATGTATCGGCTGCTTTTCGAACGGTATCCCGAAACGCGGAGCTTGTTTGAACTTCCTGAGAGAGTTATACACAAGCTTGCGTCGGCCCTGTTGGCCTACGCCCGTAGTATCGACAACCCATCGGCGTTACAGGCGGCCATCCGCCGCATGGTGCTTTCCCACGCACGCGCAGGAGTGCAGGCCGTCCATTATCCGCTGGTTTGGGAATGTTTGAGAGACGCTATAAAAGAAGTCCTGGGCCCGGATGCCACCGAGACCCTTCTGCAGGCGTGGAAGGAAGCCTATGATTTTTTAGCTCATTTACTGTCT…
RmaNOD Q52V with cleavable N-terminal His – SUMO construct (underline denotes cleaved region)	ATGGGCAGCAGCCATCATCATCATCATCACAGCAGCGGCCTGGTGCCGCGCGGCAGCCATATGGCTAGCATGTCGGACTCAGAAGTCAATCAAGAAGCTAAGCCAGAGGTCAAGCCAGAAGTCAAGCCTGAGACTCACATCAATTTAAAGGTGTCCGATGGATCTTCAGAGATCTTCTTCAAGATCAAAAAGACCACTCCTTTAAGAAGGCTGATGGAAGCGTTCGCTAAAAGACAGGGTAAGGAAATGGACTCCTTAAGATTCTTGTACGACGGTATTAGAATTCAAGCTGATCAGACCCCTGAAGATTTGGACATGGAGGATAACGATATTATTGAGGCTCACAGAGAACAGATTGGTGGATCCATGGCGCCGACCCTGTCGGAACAGACCCGTCAG…
RmaNOD Q52A	ATGGCGCCGACCCTGTCGGAACAGACCCGTCAGTTGGTACGTGCGTCTGTGCCTGCACTGCAGAAACACTCAGTCGCTATTAGCGCCACGATGTATCGGCTGCTTTTCGAACGGTATCCCGAAACGCGGAGCTTGTTTGAACTTCCTGAGAGAGCGATACACAAGCTTGCGTCGGCCCTGTTGGCCTACGCCCGTAGTATCGACAACCCATCGGCGTTACAGGCGGCCATCCGCCGCATGGTGCTTTCCCACGCACGCGCAGGAGTGCAGGCCGTCCATTATCCGCTGGTTTGGGAATGTTTGAGAGACGCTATAAAAGAAGTCCTGGGCCCGGATGCCACCGAGACCCTTCTGCAGGCGTGGAAGGAAGCCTATGATTTTTTAGCTCATTTACTGTCT…
RmaNOD Y32T Q52A	ATGGCGCCGACCCTGTCGGAACAGACCCGTCAGTTGGTACGTGCGTCTGTGCCTGCACTGCAGAAACACTCAGTCGCTATTAGCGCCACGATGACGCGGCTGCTTTTCGAACGGTATCCCGAAACGCGGAGCTTGTTTGAACTTCCTGAGAGAGCGATACACAAGCTTGCGTCGGCCCTGTTGGCCTACGCCCGTAGTATCGACAACCCATCGGCGTTACAGGCGGCCATCCGCCGCATGGTGCTTTCCCACGCACGCGCAGGAGTGCAGGCCGTCCATTATCCGCTGGTTTGGGAATGTTTGAGAGACGCTATAAAAGAAGTCCTGGGCCCGGATGCCACCGAGACCCTTCTGCAGGCGTGGAAGGAAGCCTATGATTTTTTAGCTCATTTACTGTCT…
RmaNOD Y32T Y39H L48R Q52A R79W (“THRAW”)	ATGGCGCCGACCCTGTCGGAACAGACCCGTCAGTTGGTACGTGCGTCTGTGCCTGCACTGCAGAAACACTCAGTCGCTATTAGCGCCACGATGACGCGGCTGCTTTTCGAACGGCATCCCGAAACGCGGAGCTTGTTTGAACGTCCTGAGAGAGCGATACACAAGCTTGCGTCGGCCCTGTTGGCCTACGCCCGTAGTATCGACAACCCATCGGCGTTACAGGCGGCCATCCGCTGGATGGTGCTTTCCCACGCACGCGCAGGAGTGCAGGCCGTCCATTATCCGCTGGTTTGGGAATGTTTGAGAGACGCTATAAAAGAAGTCCTGGGCCCGGATGCCACCGAGACCCTTCTGCAGGCGTGGAAGGAAGCCTATGATTTTTTAGCTCATTTACTGTCT…
RmaNOD Q52A L101N	ATGGCGCCGACCCTGTCGGAACAGACCCGTCAGTTGGTACGTGCGTCTGTGCCTGCACTGCAGAAACACTCAGTCGCTATTAGCGCCACGATGTATCGGCTGCTTTTCGAACGGTATCCCGAAACGCGGAGCTTGTTTGAACTTCCTGAGAGAGCGATACACAAGCTTGCGTCGGCCCTGTTGGCCTACGCCCGTAGTATCGACAACCCATCGGCGTTACAGGCGGCCATCCGCCGCATGGTGCTTTCCCACGCACGCGCAGGAGTGCAGGCCGTCCATTATCCGCTGGTTTGGGAATGTAATAGAGACGCTATAAAAGAAGTCCTGGGCCCGGATGCCACCGAGACCCTTCTGCAGGCGTGGAAGGAAGCCTATGATTTTTTAGCTCATTTACTGTCT…
RmaNOD Q52A 60H L101N	ATGGCGCCGACCCTGTCGGAACAGACCCGTCAGTTGGTACGTGCGTCTGTGCCTGCACTGCAGAAACACTCAGTCGCTATTAGCGCCACGATGTATCGGCTGCTTTTCGAACGGTATCCCGAAACGCGGAGCTTGTTTGAACTTCCTGAGAGAGCGATACACAAGCTTGCGTCGGCCCATTTGGCCTACGCCCGTAGTATCGACAACCCATCGGCGTTACAGGCGGCCATCCGCCGCATGGTGCTTTCCCACGCACGCGCAGGAGTGCAGGCCGTCCATTATCCGCTGGTTTGGGAATGTAATAGAGACGCTATAAAAGAAGTCCTGGGCCCGGATGCCACCGAGACCCTTCTGCAGGCGTGGAAGGAAGCCTATGATTTTTTAGCTCATTTACTGTCT…
RmaNOD Q52A 60H L101N I105M	ATGGCGCCGACCCTGTCGGAACAGACCCGTCAGTTGGTACGTGCGTCTGTGCCTGCACTGCAGAAACACTCAGTCGCTATTAGCGCCACGATGTATCGGCTGCTTTTCGAACGGTATCCCGAAACGCGGAGCTTGTTTGAACTTCCTGAGAGAGCGATACACAAGCTTGCGTCGGCCCATTTGGCCTACGCCCGTAGTATCGACAACCCATCGGCGTTACAGGCGGCCATCCGCCGCATGGTGCTTTCCCACGCACGCGCAGGAGTGCAGGCCGTCCATTATCCGCTGGTTTGGGAATGTAATAGAGACGCTATGAAAGAAGTCCTGGGCCCGGATGCCACCGAGACCCTTCTGCAGGCGTGGAAGGAAGCCTATGATTTTTTAGCTCATTTACTGTCT…
RmaNOD L20W Q52A L56I 60H L101N I105M	ATGGCGCCGACCCTGTCGGAACAGACCCGTCAGTTGGTACGTGCGTCTGTGCCTGCATGGCAGAAACACTCAGTCGCTATTAGCGCCACGATGTATCGGCTGCTTTTCGAACGGTATCCCGAAACGCGGAGCTTGTTTGAACTTCCTGAGAGAGCGATACACAAGATTGCGTCGGCCCATTTGGCCTACGCCCGTAGTATCGACAACCCATCGGCGTTACAGGCGGCCATCCGCCGCATGGTGCTTTCCCACGCACGCGCAGGAGTGCAGGCCGTCCATTATCCGCTGGTTTGGGAATGTAATAGAGACGCTATGAAAGAAGTCCTGGGCCCGGATGCCACCGAGACCCTTCTGCAGGCGTGGAAGGAAGCCTATGATTTTTTAGCTCATTTACTGTCT…
pET22_vector_sequence (3' end of pET sequence is at 5' end of coding sequence)	gatccggctgctaacaaagcccgaaaggaagctgagttggctgctgccaccgctgagcaataactagcataaccccttggggcctctaaacgggtcttgaggggttttttgctgaaaggaggaactatatccggattggcgaatgggacgcgccctgtagcggcgcattaagcgcggcgggtgtggtggttacgcgcagcgtgaccgctacacttgccagcgccctagcgcccgctcctttcgctttcttcccttcctttctcgccacgttcgccggctttccccgtcaagctctaaatcgggggctccctttagggttccgatttagtgctttacggcacctcgaccccaaaaaacttgattagggtgatggttcacgtagtgggccatcgccctgat…
